# Supplementary material for: Testing the effects of topography, geometry and kinematics on modeled thermochronometer cooling ages in the eastern Bhutan Himalaya
Source: Copernicus journal article supplement (doi:10.5194/se-2017-117), 2017-10-26
Supplement: Supplementary file 1 [file se-2017-117-supplement.pdf]

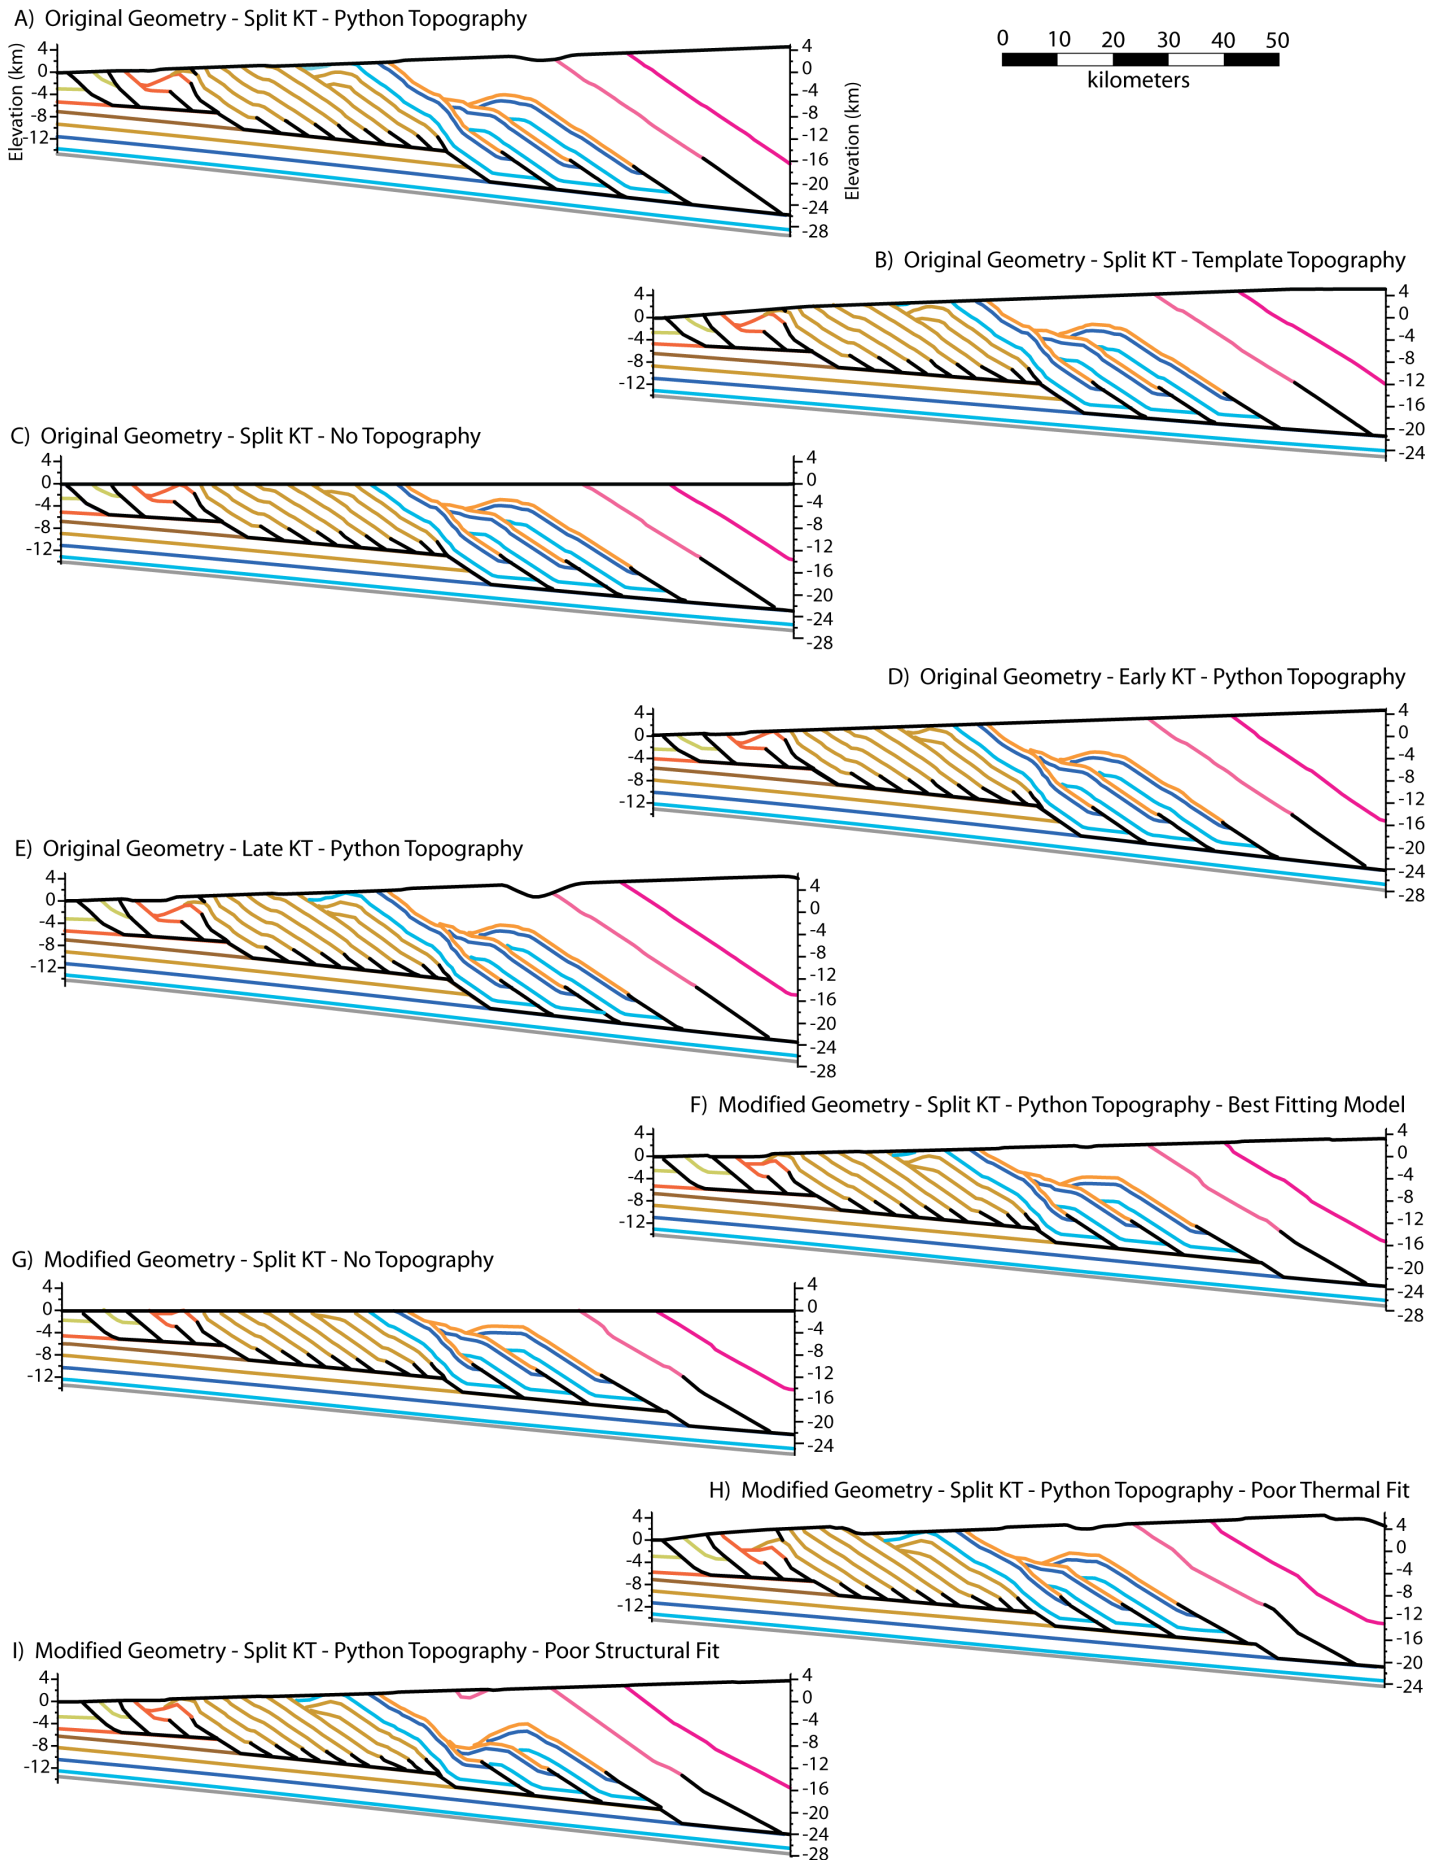

Supplemental figure 1: Flexural modeling output of the Trashigang section for all models presented in Sections 4 and 5.

### New Geometric Solution - Python Topography

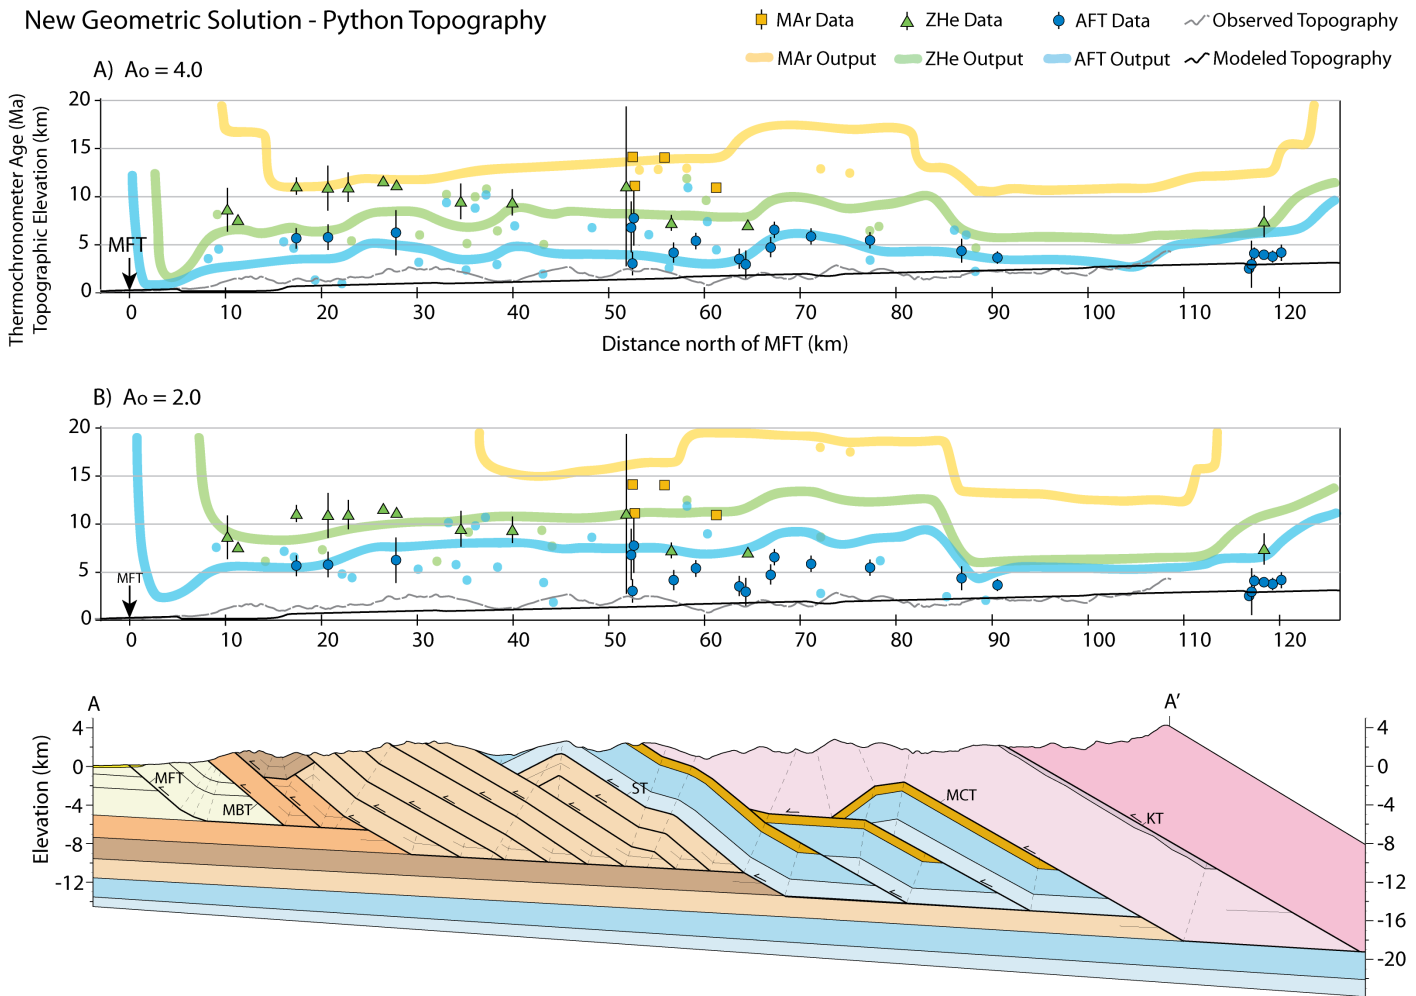

**Supplementary Figure 2: Separate plots of predicted MAr, ZHe, and AFT cooling ages compared to published thermochronometer data using a thermal model with  $A_o$  of  $2.0 \mu\text{W}/\text{m}^3$  (a) and  $4.0 \mu\text{W}/\text{m}^3$  (b). The flexural model of the modified geometry used with Python Topography and Split KT scenario.**

Supplemental Table 1:

a)  
Published Thermochronologic Data Along Trashigang Cross-Section: Spatial Information

| Study                  | Sample   | Unit | Elevation (m) | Longitude (°E) | Latitude (°N) | Distance N of MFT (km) |
|------------------------|----------|------|---------------|----------------|---------------|------------------------|
| Long et al. [2012]     | BU07-53  | Pzg  | 655           | 91.48011       | 26.86572      | 10.2                   |
| Long et al. [2012]     | BU07-54  | Pzd  | 700           | 91.48028       | 26.87497      | 11.3                   |
| Long et al. [2012]     | BU07-33  | Pzd  | 1710          | 91.54794       | 26.93311      | 17.4                   |
| Long et al. [2012]     | BU07-35  | Pzb  | 1580          | 91.54761       | 26.95992      | 20.7                   |
| Long et al. [2012]     | BU07-36  | Pzb  | 1785          | 91.53083       | 26.97442      | 22.8                   |
| Long et al. [2012]     | NBH-18   | Pzb  | 1815          | 91.52072       | 27.01200      | 26.5                   |
| Long et al. [2012]     | BU07-37  | Pzb  | 2385          | 91.50142       | 27.02675      | 27.8                   |
| Long et al. [2012]     | BU07-42  | Pzb  | 2165          | 91.52089       | 27.08486      | 34.6                   |
| Long et al. [2012]     | BU07-43B | Pcd  | 2315          | 91.56708       | 27.13450      | 39.9                   |
| Long et al. [2012]     | BU07-55  | Pzj  | 2350          | 91.52122       | 27.24222      | 51.9                   |
| Grujic et al. [2006]   | BH53     | GHlo | 2405          | 91.548083      | 27.237361     | 52.5                   |
| Grujic et al. [2006]   | BH52     | GHlo | 2350          | 91.554667      | 27.236056     | 52.5                   |
| Stuwe & Foster [2001]* | 8        | GHlo | 2540          | 91.53157       | 27.24116      | 52.5                   |
| Stuwe & Foster [2001]* | 9        | GHlo | 2480          | 91.52660       | 27.24549      | 52.5                   |
| Stuwe & Foster [2001]* | 11       | GHlo | 1750          | 91.54075       | 27.27539      | 55.8                   |
| Long et al. [2012]     | BH-57    | Pcd  | 605           | 91.44656       | 27.27869      | 56.5                   |
| Grujic et al. [2006]   | BH60     | Pzj  | 795           | 91.480667      | 27.282361     | 56.8                   |
| Grujic et al. [2006]   | BH61     | GHlo | 780           | 91.491000      | 27.303417     | 59.1                   |
| Stuwe & Foster [2001]* | 12       | GHlo | 1060          | 91.54378       | 27.32288      | 61.2                   |
| Grujic et al. [2006]   | BH90     | GHlo | 910           | 91.574528      | 27.344972     | 63.6                   |
| Grujic et al. [2006]   | BH64     | GHlo | 825           | 91.554472      | 27.350056     | 64.3                   |
| Long et al. [2012]     | BH-78    | Pzc  | 1000          | 91.63897       | 27.35144      | 64.5                   |
| Grujic et al. [2006]   | BH324    | GHlo | 1995          | 91.59683       | 27.374361     | 66.9                   |
| Grujic et al. [2006]   | BH94     | Pzc  | 2050          | 91.599833      | 27.375333     | 67.3                   |
| Grujic et al. [2006]   | BH100    | GHlo | 905           | 91.563722      | 27.411389     | 71.1                   |
| Grujic et al. [2006]   | BH72     | GHlo | 1420          | 91.554722      | 27.465000     | 77.3                   |
| Grujic et al. [2006]   | BH66     | GHlo | 930           | 91.561139      | 27.551361     | 86.8                   |
| Grujic et al. [2006]   | BH70     | GHlo | 1760          | 91.499528      | 27.584167     | 90.6                   |

|                       |        |     |      |          |          |       |
|-----------------------|--------|-----|------|----------|----------|-------|
| Coutand et al. [2014] | BH-363 | GHh | 3610 | 91.37263 | 27.96956 | 117.0 |
| Coutand et al. [2014] | BH-351 | GHh | 3870 | 91.30357 | 27.97318 | 117.1 |
| Coutand et al. [2014] | BH-352 | GHh | 3880 | 91.29016 | 27.97416 | 117.4 |
| Coutand et al. [2014] | BH-357 | GHh | 4085 | 91.29827 | 27.98563 | 118.3 |
| Coutand et al. [2014] | BH-355 | GHh | 4275 | 91.2987  | 27.99005 | 119.3 |
| Coutand et al. [2014] | BH-362 | GHh | 4300 | 91.29901 | 27.99750 | 120.2 |

b)

Published Thermochronologic Data Along Trashigang Cross-Section: Cooling Ages

| Sample   | Central AFT Age (Ma) | 2 $\sigma$ Analytical Error (Ma) | Mean ZHe Age (Ma) | 2 $\sigma$ Variability Range (Ma) | Reported MAr Age (Ma) | 2 $\sigma$ Analytical Error (Ma) |
|----------|----------------------|----------------------------------|-------------------|-----------------------------------|-----------------------|----------------------------------|
| BU07-53  | -                    | -                                | 8.65              | 2.22                              | -                     | -                                |
| BU07-54  | -                    | -                                | 7.61              | 0.28                              | -                     | -                                |
| BU07-33  | 5.69                 | 1.04                             | 11.12             | 0.85                              | -                     | -                                |
| BU07-35  | 5.82                 | 1.28                             | 10.91             | 2.29                              | -                     | -                                |
| BU07-36  | -                    | -                                | 11.00             | 1.47                              | -                     | -                                |
| NBH-18   | -                    | -                                | 11.60             | 0.03                              | -                     | -                                |
| BU07-37  | 6.27                 | 2.34                             | 11.25             | 0.50                              | -                     | -                                |
| BU07-42  | -                    | -                                | 9.54              | 1.82                              | -                     | -                                |
| BU07-43B | -                    | -                                | 9.43              | 1.33                              | -                     | -                                |
| BU07-55  | -                    | -                                | 11.07             | 8.27                              | -                     | -                                |
| BH53     | 6.9                  | 2.6                              | -                 | -                                 | -                     | -                                |
| BH52     | 7.8                  | 2.8                              | -                 | -                                 | -                     | -                                |
| 8        | -                    | -                                | -                 | -                                 | 14.1                  | 0.2                              |
| 9        | 3.1                  | 1.2                              | -                 | -                                 | 11.1                  | 0.4                              |
| 11       | -                    | -                                | -                 | -                                 | 14.1                  | 0.4                              |
| BH-57    | -                    | -                                | 7.30              | 0.77                              | -                     | -                                |
| BH60     | 4.2                  | 1.0                              | -                 | -                                 | -                     | -                                |
| BH61     | 5.4                  | 0.8                              | -                 | -                                 | -                     | -                                |
| 12       | -                    | -                                | -                 | -                                 | 11.0                  | 0.4                              |
| BH90     | 3.6                  | 1.0                              | -                 | -                                 | -                     | -                                |
| BH64     | 3.0                  | 1.4                              | -                 | -                                 | -                     | -                                |
| BH-78    | -                    | -                                | 7.09              | 0.28                              | -                     | -                                |
| BH324    | 4.8                  | 1.0                              | -                 | -                                 | -                     | -                                |

|        |     |     |      |      |   |   |
|--------|-----|-----|------|------|---|---|
| BH94   | 6.6 | 0.8 | -    | -    | - | - |
| BH100  | 5.9 | 0.8 | -    | -    | - | - |
| BH72   | 5.5 | 0.8 | -    | -    | - | - |
| BH66   | 4.4 | 1.2 | -    | -    | - | - |
| BH70   | 3.7 | 0.6 | -    | -    | - | - |
| BH-363 | 2.5 | 0.4 | -    | -    | - | - |
| BH-351 | 3.0 | 2.4 | -    | -    | - | - |
| BH-352 | 4.1 | 0.6 | -    | -    | - | - |
| BH-357 | 4.0 | 0.4 | 7.42 | 1.56 | - | - |
| BH-355 | 3.8 | 0.6 | -    | -    | - | - |
| BH-362 | 4.2 | 0.8 | -    | -    | - | - |

**Supplementary Table 1: Thermochronometer sample locations and original analysis studies (a), and reported cooling ages (b) used in this study. ZHe ages are based on the mean reported age among all aliquots for each sample;  $2\sigma$  error shown for ZHe includes variability among aliquots. Reported AFT and MAr data include  $2\sigma$  analytical error. \*Latitude and longitude of samples from Stüwe and Foster [(2001)] were estimated using ESRI ArcMap WGS84 datum.**
