# Supplementary material for: Testing the effects of topography, geometry and kinematics on modeled thermochronometer cooling ages in the eastern Bhutan Himalaya
Source: Copernicus journal article supplement (doi:10.5194/se-2017-117), 2017-10-26
Supplement: Supplementary file [file se-2017-117-AC5-supplement.pdf]

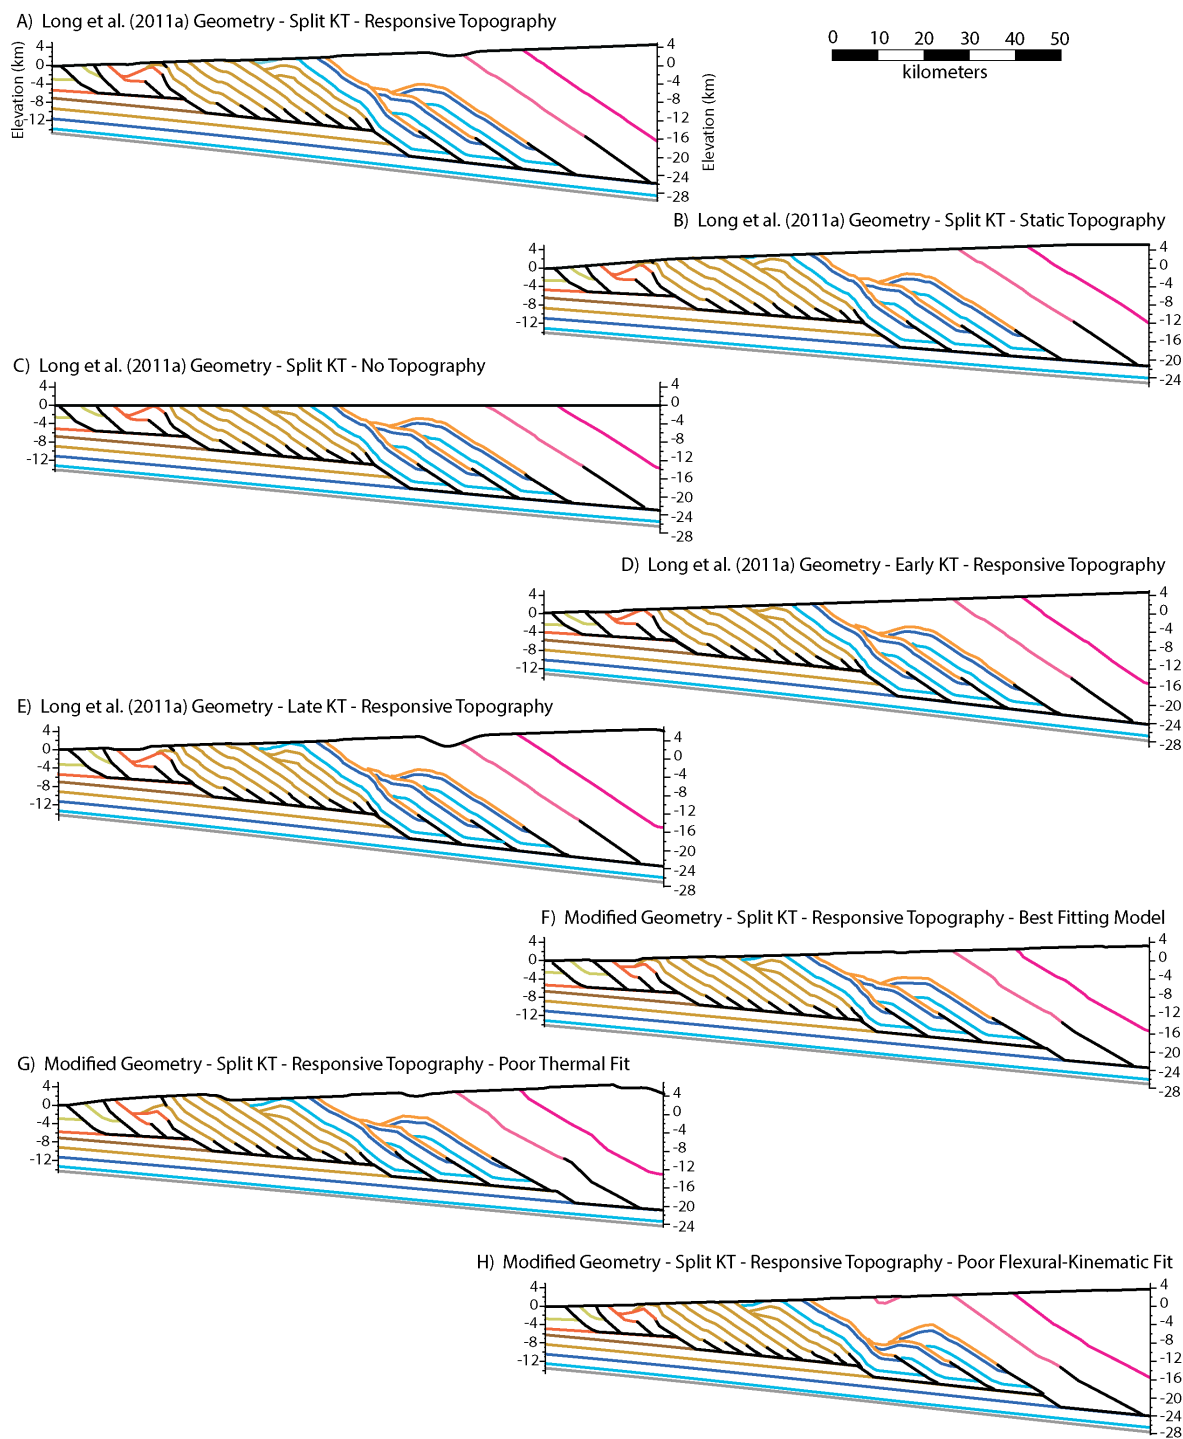

**Supplementary Figure 1: Flexural-kinematic modelling output of the present-day Trashigang cross-section for all models presented in sections 4 and 5.**

# Modified Geometric Solution - Best Fit

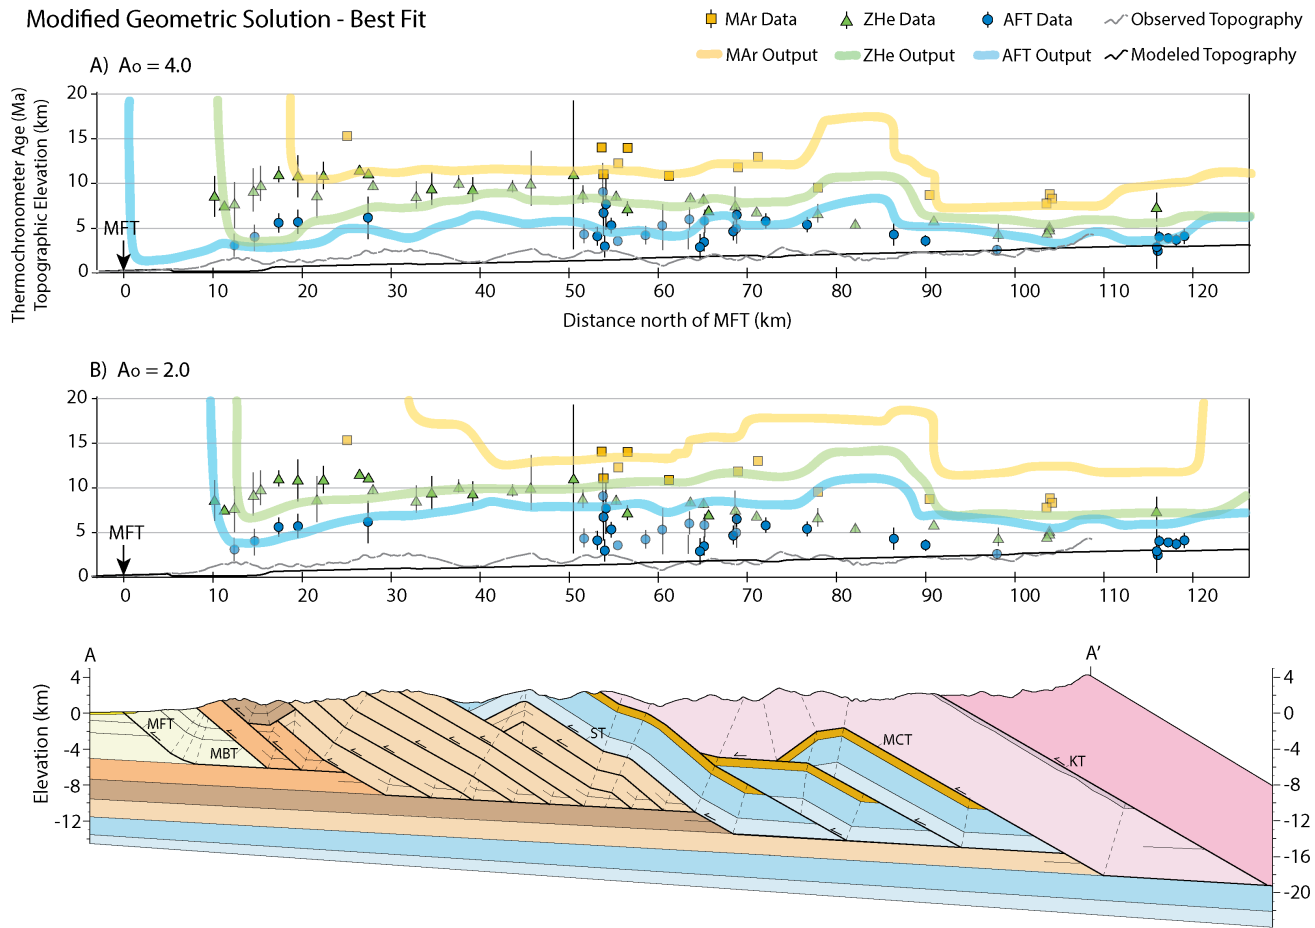

**Supplementary Figure 2: Predicted MAr (yellow), ZHe (green), and AFT (blue) cooling ages using a flexural-kinematic model of the modified Trashigang cross-section geometry proposed in this study (Supplementary Figure 1f), preferred shortening rates (Table 3b), and surface radiogenic heat production values of Velocity B, and surface radiogenic heat production values of (A) 4.0  $\mu\text{W}/\text{m}^3$  and (B) 2.0  $\mu\text{W}/\text{m}^3$ . The Baxa footwall ramp in the décollement has been shifted 35 km north. Published data include additional ages from the Kuru Chu line of section west of the Trashigang section (Long et al., 2012), shown in the graphs with lighter-colored symbols. The flexural-kinematic model used a Split KT kinematic scenario and Responsive topography.**

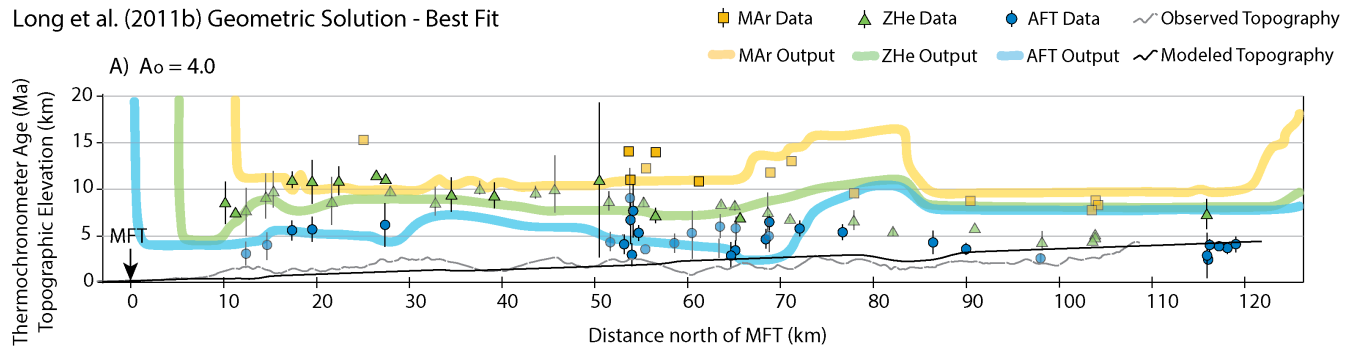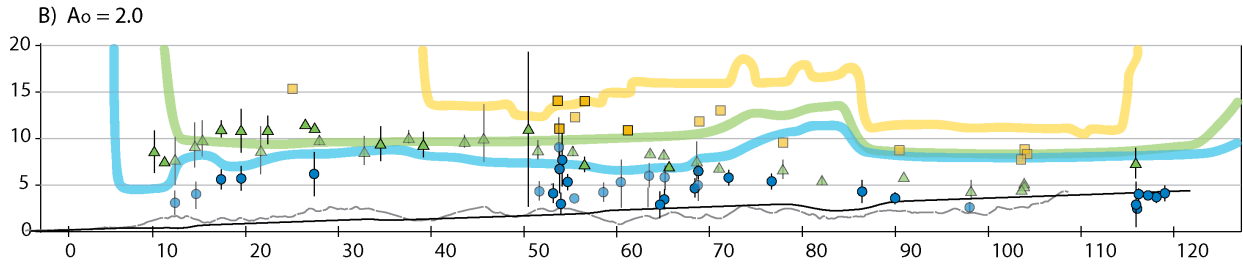

**Supplementary Figure 3: Predicted MAR (yellow), ZHe (green), and AFT (blue) cooling ages using the Trashigang cross-section geometry originally proposed by Long et al. (2011a), Velocity B, and surface radiogenic heat production values of (A)  $4.0 \mu\text{W}/\text{m}^3$  and (B)  $2.0 \mu\text{W}/\text{m}^3$ . Published data include additional ages from the Kuru Chu line of section west of the Trashigang section (Long et al., 2012), shown in the graphs with lighter-colored symbols. The flexural-kinematic model used a Split KT kinematic scenario and Responsive topography (Supplementary Figure 1a).**

| Study                  | Sample   | Unit | Elevation (m) | Longitude (°E) | Latitude (°N) | Central AFT Age (Ma) | 2 $\sigma$ Analytical Error (Ma) | Mean ZHe Age (Ma) | 2 $\sigma$ Variability Range (Ma) | Reported MAr Age (Ma) | 2 $\sigma$ Analytical Error (Ma) |
|------------------------|----------|------|---------------|----------------|---------------|----------------------|----------------------------------|-------------------|-----------------------------------|-----------------------|----------------------------------|
| Stuwe & Foster (2001)* | 8        | GHlo | 2540          | 91.53157       | 27.24116      | -                    | -                                | -                 | -                                 | 14.1                  | 0.2                              |
| Stuwe & Foster (2001)* | 9        | GHlo | 2480          | 91.52660       | 27.24549      | 3.1                  | 1.2                              | -                 | -                                 | 11.1                  | 0.4                              |
| Stuwe & Foster (2001)* | 11       | GHlo | 1750          | 91.54075       | 27.27539      | -                    | -                                | -                 | -                                 | 14.1                  | 0.4                              |
| Stuwe & Foster (2001)* | 12       | GHlo | 1060          | 91.54378       | 27.32288      | -                    | -                                | -                 | -                                 | 11.0                  | 0.4                              |
| Grujic et al. (2006)   | BH53     | GHlo | 2405          | 91.548083      | 27.237361     | 6.9                  | 2.6                              | -                 | -                                 | -                     | -                                |
| Grujic et al. (2006)   | BH52     | GHlo | 2350          | 91.554667      | 27.236056     | 7.8                  | 2.8                              | -                 | -                                 | -                     | -                                |
| Grujic et al. (2006)   | BH60     | Pzj  | 795           | 91.480667      | 27.282361     | 4.2                  | 1.0                              | -                 | -                                 | -                     | -                                |
| Grujic et al. (2006)   | BH61     | GHlo | 780           | 91.491000      | 27.303417     | 5.4                  | 0.8                              | -                 | -                                 | -                     | -                                |
| Grujic et al. (2006)   | BH90     | GHlo | 910           | 91.574528      | 27.344972     | 3.6                  | 1.0                              | -                 | -                                 | -                     | -                                |
| Grujic et al. (2006)   | BH64     | GHlo | 825           | 91.554472      | 27.350056     | 3.0                  | 1.4                              | -                 | -                                 | -                     | -                                |
| Grujic et al. (2006)   | BH324    | GHlo | 1995          | 91.59683       | 27.374361     | 4.8                  | 1.0                              | -                 | -                                 | -                     | -                                |
| Grujic et al. (2006)   | BH94     | Pzc  | 2050          | 91.599833      | 27.375333     | 6.6                  | 0.8                              | -                 | -                                 | -                     | -                                |
| Grujic et al. (2006)   | BH100    | GHlo | 905           | 91.563722      | 27.411389     | 5.9                  | 0.8                              | -                 | -                                 | -                     | -                                |
| Grujic et al. (2006)   | BH72     | GHlo | 1420          | 91.554722      | 27.465000     | 5.5                  | 0.8                              | -                 | -                                 | -                     | -                                |
| Grujic et al. (2006)   | BH66     | GHlo | 930           | 91.561139      | 27.551361     | 4.4                  | 1.2                              | -                 | -                                 | -                     | -                                |
| Grujic et al. (2006)   | BH70     | GHlo | 1760          | 91.499528      | 27.584167     | 3.7                  | 0.6                              | -                 | -                                 | -                     | -                                |
| Long et al. (2012)     | BU07-53  | Pzg  | 655           | 91.48011       | 26.86572      | -                    | -                                | 8.65              | 2.22                              | -                     | -                                |
| Long et al. (2012)     | BU07-54  | Pzd  | 700           | 91.48028       | 26.87497      | -                    | -                                | 7.61              | 0.28                              | -                     | -                                |
| Long et al. (2012)     | BU07-33  | Pzd  | 1710          | 91.54794       | 26.93311      | 5.69                 | 1.04                             | 11.12             | 0.85                              | -                     | -                                |
| Long et al. (2012)     | BU07-35  | Pzb  | 1580          | 91.54761       | 26.95992      | 5.82                 | 1.28                             | 10.91             | 2.29                              | -                     | -                                |
| Long et al. (2012)     | BU07-36  | Pzb  | 1785          | 91.53083       | 26.97442      | -                    | -                                | 11.00             | 1.47                              | -                     | -                                |
| Long et al. (2012)     | NBH-18   | Pzb  | 1815          | 91.52072       | 27.01200      | -                    | -                                | 11.60             | 0.03                              | -                     | -                                |
| Long et al. (2012)     | BU07-37  | Pzb  | 2385          | 91.50142       | 27.02675      | 6.27                 | 2.34                             | 11.25             | 0.50                              | -                     | -                                |
| Long et al. (2012)     | BU07-42  | Pzb  | 2165          | 91.52089       | 27.08486      | -                    | -                                | 9.54              | 1.82                              | -                     | -                                |
| Long et al. (2012)     | BU07-43B | Pcd  | 2315          | 91.56708       | 27.13450      | -                    | -                                | 9.43              | 1.33                              | -                     | -                                |
| Long et al. (2012)     | BU07-55  | Pzj  | 2350          | 91.52122       | 27.24222      | -                    | -                                | 11.07             | 8.27                              | -                     | -                                |
| Long et al. (2012)     | BH-57    | Pcd  | 605           | 91.44656       | 27.27869      | -                    | -                                | 7.30              | 0.77                              | -                     | -                                |
| Long et al. (2012)     | BH-78    | Pzc  | 1000          | 91.63897       | 27.35144      | -                    | -                                | 7.09              | 0.28                              | -                     | -                                |
| Coutand et al. (2014)  | BH-363   | GHH  | 3610          | 91.37263       | 27.96956      | 2.5                  | 0.4                              | -                 | -                                 | -                     | -                                |
| Coutand et al. (2014)  | BH-351   | GHH  | 3870          | 91.30357       | 27.97318      | 3.0                  | 2.4                              | -                 | -                                 | -                     | -                                |
| Coutand et al. (2014)  | BH-352   | GHH  | 3880          | 91.29016       | 27.97416      | 4.1                  | 0.6                              | -                 | -                                 | -                     | -                                |
| Coutand et al. (2014)  | BH-357   | GHH  | 4085          | 91.29827       | 27.98563      | 4.0                  | 0.4                              | 7.42              | 1.56                              | -                     | -                                |
| Coutand et al. (2014)  | BH-355   | GHH  | 4275          | 91.2987        | 27.99005      | 3.8                  | 0.6                              | -                 | -                                 | -                     | -                                |
| Coutand et al. (2014)  | BH-362   | GHH  | 4300          | 91.29901       | 27.99750      | 4.2                  | 0.8                              | -                 | -                                 | -                     | -                                |

**Supplementary Table 1: Thermochronometer sample locations and reported cooling ages used in this study. Reported AFT and MAr data include 2 $\sigma$  analytical error. ZHe ages are based on the mean reported age among all aliquots for each sample; 2 $\sigma$  range shown for ZHe includes variability among aliquots. \*Latitude and longitude of samples from Stüwe and Foster**

5 (2001) were estimated using ESRI ArcMap WGS84 datum.
